# Supplementary material for: Ultrasmall MnO@N-rich carbon nanosheets for high-power asymmetric supercapacitors
Source: Royal Society of Chemistry journal article supplement (doi:10.1039/c4ta02055c), 2014-06-04
Supplement: c4ta02055c1.pdf [file c4ta02055c1.pdf]

Electronic Supplementary Information (ESI)

## Ultrasmall MnO@N-rich carbon nanosheets for high-power asymmetric supercapacitors

Mei Yang, Yiren Zhong, Xianlong Zhou, Jingjing Ren, Liwei Su, Jinping Wei, Zhen Zhou\*

*Tianjin Key Laboratory of Metal and Molecule Based Material Chemistry, Key Laboratory of Advanced Energy Materials Chemistry (Ministry of Education), Institute of New Energy Material Chemistry, Collaborative Innovation Center of Chemical Science and Engineering (Tianjin), Nankai University, Tianjin 300071, China. E-mail: zhouzhen@nankai.edu.cn*

Table S1 Elemental quantitative analyses were determined by comprehensive techniques of EA, ICP, XPS and EDS.

|        | C (wt%) | N (wt%) | Mn (wt%) | O (wt%) |
|--------|---------|---------|----------|---------|
| EA/ICP | 32.73   | 13.25   | 39.79    | -       |
| XPS    | 33.26   | 18.06   | 36.44    | 12.24   |
| EDS    | 34.80   | 14.66   | 39.24    | 11.30   |

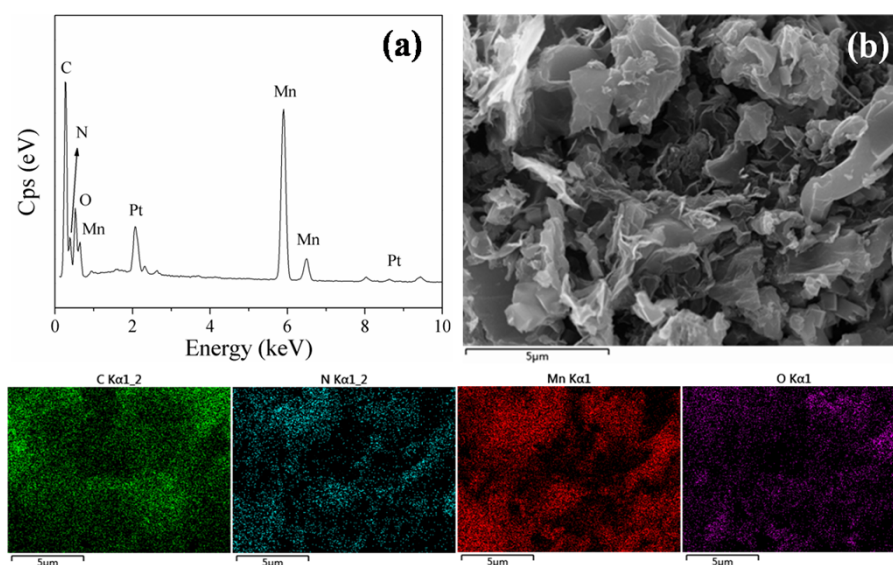

Figure S1. (a) EDS of MnO@NCs. The bottom images show element mapping from the SEM image (b).

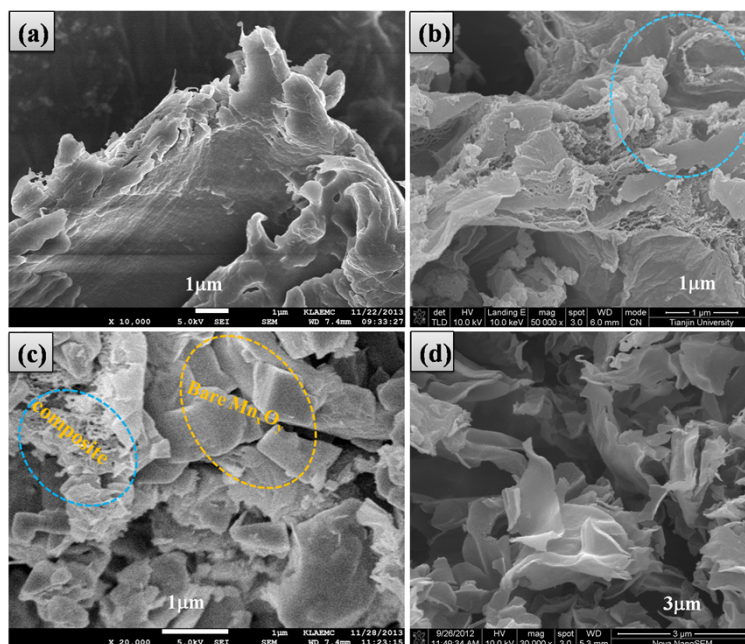

Figure S2. SEM images of the precursor (a) and products calcined at 700°C (b), 800°C (c), or 750°C (d).

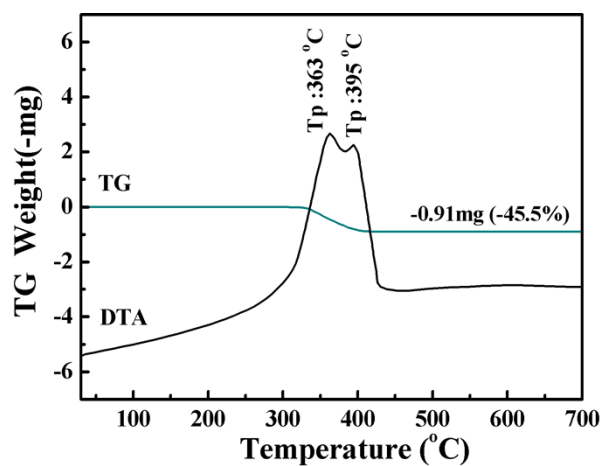

Figure S3. TG-DTA curves of MnO@NCs sintered in air.

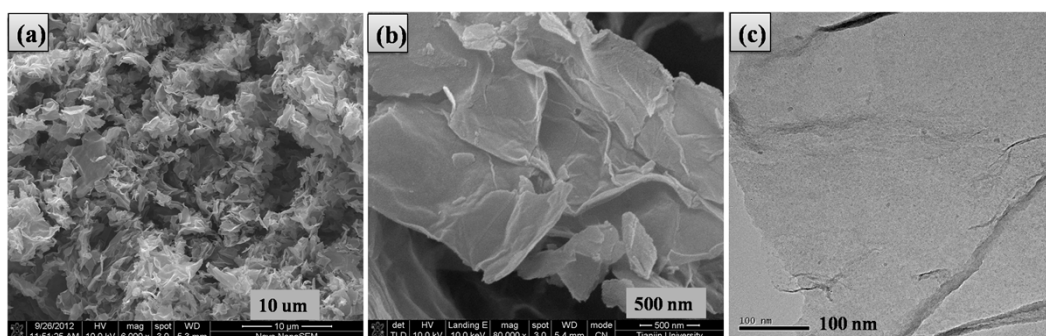

Figure S4. Specifically exterior textures for the SEM images (a,b) and TEM image (c) of MnO@NCs.

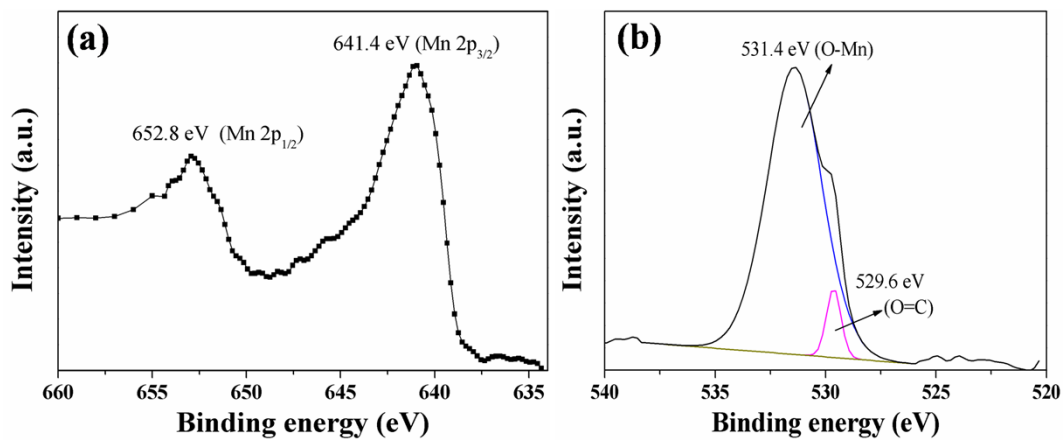

Figure S5. High-resolution XPS of Mn2p (a) and O1s peaks (b).

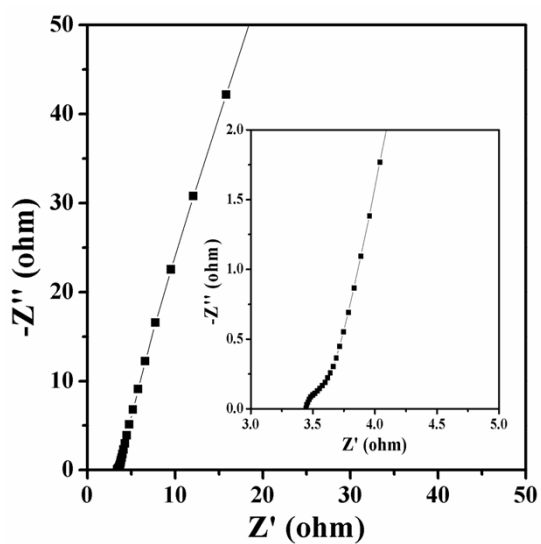

Figure S6. Nyquist plot of the MnO@NCs electrode, and inset shows enlarged profile at high frequency.

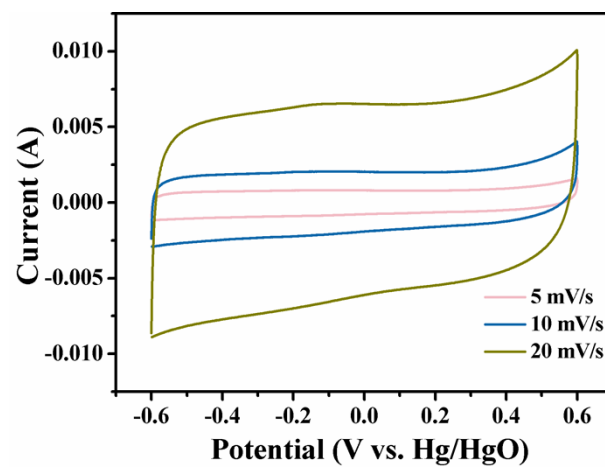

Figure S7. CV curves of N-rich carbon samples tested in a three-electrode system at different scan rates.

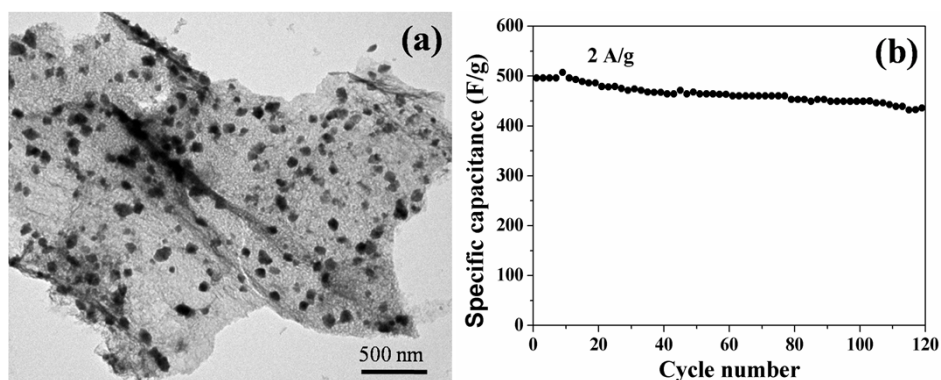

Figure S8. TEM image (a) and cyclic performance of MnO@NCs-100nm (b).

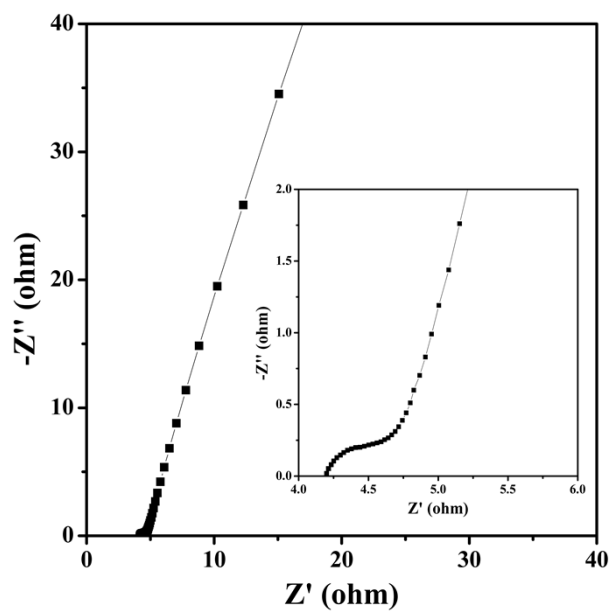

Figure S9. Nyquist plot of the asymmetric supercapacitor, and inset shows enlarged profile at high frequency
